# Supplementary material for: First Report on the Latvian SARS-CoV-2 Isolate Genetic Diversity
Source: Front Med (Lausanne). 2021 Apr 6;8:626000. doi: 10.3389/fmed.2021.626000 (PMC8055824; doi:10.3389/fmed.2021.626000)
Supplement: Supplementary Table 2 — Latvian SARS-CoV-2 isolate sequencing approaches. [file Table_2.xlsx]

## Sheet: Sheet1
GISAID isolate name	Accession ID	Collection date	Number of mutations	Average coverage	Type of NGS library	Sequencing technology
hCoV-19/Latvia/01/2020	EPI_ISL_421653	2020-03-25	7	7,138x	Metatranscriptome	DNBSEQ-G400RS, MGI Tech Co., Ltd
hCoV-19/Latvia/02/2020	EPI_ISL_421654	2020-03-25	6	91x	Metatranscriptome	DNBSEQ-G400RS, MGI Tech Co., Ltd
hCoV-19/Latvia/03/2020	EPI_ISL_421655	2020-03-25	3	21x	Metatranscriptome	DNBSEQ-G400RS, MGI Tech Co., Ltd
hCoV-19/Latvia/04/2020	EPI_ISL_421656	2020-03-25	8	2,398x	Metatranscriptome	DNBSEQ-G400RS, MGI Tech Co., Ltd
hCoV-19/Latvia/05/2020	EPI_ISL_426285	2020-03-30	9	55x	Metatranscriptome	DNBSEQ-G400RS, MGI Tech Co., Ltd
hCoV-19/Latvia/06/2020	EPI_ISL_426286	2020-03-30	6	1,457x	Metatranscriptome	DNBSEQ-G400RS, MGI Tech Co., Ltd
hCoV-19/Latvia/07/2020	EPI_ISL_426287	2020-03-30	7	129x	Metatranscriptome	DNBSEQ-G400RS, MGI Tech Co., Ltd
hCoV-19/Latvia/08/2020	EPI_ISL_426288	2020-03-30	6	304x	Metatranscriptome	DNBSEQ-G400RS, MGI Tech Co., Ltd
hCoV-19/Latvia/09/2020	EPI_ISL_426289	2020-03-30	8	45x	Metatranscriptome	DNBSEQ-G400RS, MGI Tech Co., Ltd
hCoV-19/Latvia/010/2020	EPI_ISL_437089	2020-03-23	5	518x	Metatranscriptome	DNBSEQ-G400RS, MGI Tech Co., Ltd
hCoV-19/Latvia/011/2020	EPI_ISL_437090	2020-03-24	5	37x	Metatranscriptome	DNBSEQ-G400RS, MGI Tech Co., Ltd
hCoV-19/Latvia/012/2020	EPI_ISL_437091	2020-03-23	7	4,303x	Metatranscriptome	DNBSEQ-G400RS, MGI Tech Co., Ltd
hCoV-19/Latvia/013/2020	EPI_ISL_437092	2020-03-20	7	53x	Metatranscriptome	DNBSEQ-G400RS, MGI Tech Co., Ltd
hCoV-19/Latvia/014/2020	EPI_ISL_437093	2020-03-22	8	511x	Metatranscriptome	DNBSEQ-G400RS, MGI Tech Co., Ltd
hCoV-19/Latvia/015/2020	EPI_ISL_437094	2020-03-23	6	669x	Metatranscriptome	DNBSEQ-G400RS, MGI Tech Co., Ltd
hCoV-19/Latvia/016/2020	EPI_ISL_437095	2020-03-23	7	3,563x	Metatranscriptome	DNBSEQ-G400RS, MGI Tech Co., Ltd
hCoV-19/Latvia/017/2020	EPI_ISL_437096	2020-03-23	7	220x	Metatranscriptome	DNBSEQ-G400RS, MGI Tech Co., Ltd
hCoV-19/Latvia/018/2020	EPI_ISL_450518	2020-04-18	13	2,277x	Metatranscriptome	DNBSEQ-G400RS, MGI Tech Co., Ltd
hCoV-19/Latvia/019/2020	EPI_ISL_450519	2020-04-14	8	6,173x	Metatranscriptome	DNBSEQ-G400RS, MGI Tech Co., Ltd
hCoV-19/Latvia/020/2020	EPI_ISL_450520	2020-04-28	7	1,074x	Metatranscriptome	DNBSEQ-G400RS, MGI Tech Co., Ltd
hCoV-19/Latvia/021/2020	EPI_ISL_450521	2020-04-28	7	563x	Metatranscriptome	DNBSEQ-G400RS, MGI Tech Co., Ltd
hCoV-19/Latvia/022/2020	EPI_ISL_450522	2020-04-28	8	3,836x	Metatranscriptome	DNBSEQ-G400RS, MGI Tech Co., Ltd
hCoV-19/Latvia/023/2020	EPI_ISL_450523	2020-04-28	8	1,363x	Metatranscriptome	DNBSEQ-G400RS, MGI Tech Co., Ltd
hCoV-19/Latvia/024/2020	EPI_ISL_450524	2020-04-19	11	37x	Metatranscriptome	DNBSEQ-G400RS, MGI Tech Co., Ltd
hCoV-19/Latvia/025/2020	EPI_ISL_486390	2020-05-09	12	2715x	Enrichment by hybridization capture	Illumina, MiSeq
hCoV-19/Latvia/026/2020	EPI_ISL_486391	2020-05-03	8	3297x	Enrichment by hybridization capture	Illumina, MiSeq
hCoV-19/Latvia/027/2020	EPI_ISL_486410	2020-05-09	13	5930x	Enrichment by hybridization capture	Illumina, MiSeq
hCoV-19/Latvia/028/2020	EPI_ISL_486411	2020-05-07	6	191x	Metatranscriptome	DNBSEQ-G400RS, MGI Tech Co., Ltd
hCoV-19/Latvia/029/2020	EPI_ISL_486412	2020-04-29	14	7839x	Metatranscriptome	DNBSEQ-G400RS, MGI Tech Co., Ltd
hCoV-19/Latvia/030/2020	EPI_ISL_486413	2020-05-10	7	861x	Metatranscriptome	DNBSEQ-G400RS, MGI Tech Co., Ltd
hCoV-19/Latvia/031/2020	EPI_ISL_486414	2020-05-07	10	79x	Metatranscriptome	DNBSEQ-G400RS, MGI Tech Co., Ltd
hCoV-19/Latvia/032/2020	EPI_ISL_486415	2020-04-27	12	330x	Metatranscriptome	DNBSEQ-G400RS, MGI Tech Co., Ltd
hCoV-19/Latvia/033/2020	EPI_ISL_486416	2020-04-27	14	27x	Metatranscriptome	DNBSEQ-G400RS, MGI Tech Co., Ltd
hCoV-19/Latvia/034/2020	EPI_ISL_486417	2020-05-08	7	138x	Metatranscriptome	DNBSEQ-G400RS, MGI Tech Co., Ltd
hCoV-19/Latvia/035/2020	EPI_ISL_486418	2020-05-09	6	604x	Metatranscriptome	DNBSEQ-G400RS, MGI Tech Co., Ltd
hCoV-19/Latvia/036/2020	EPI_ISL_486419	2020-04-29	8	25x	Metatranscriptome	DNBSEQ-G400RS, MGI Tech Co., Ltd
hCoV-19/Latvia/037/2020	EPI_ISL_486420	2020-04-29	7	30x	Metatranscriptome	DNBSEQ-G400RS, MGI Tech Co., Ltd
hCoV-19/Latvia/038/2020	EPI_ISL_486421	2020-04-27	7	7480x	Metatranscriptome	DNBSEQ-G400RS, MGI Tech Co., Ltd
hCoV-19/Latvia/039/2020	EPI_ISL_486422	2020-03-15	8	6066x	Enrichment by hybridization capture	Illumina, MiSeq
hCoV-19/Latvia/040/2020	EPI_ISL_486423	2020-03-17	1	7129x	Enrichment by hybridization capture	Illumina, MiSeq
hCoV-19/Latvia/041/2020	EPI_ISL_486424	2020-03-22	8	6560x	Enrichment by hybridization capture	Illumina, MiSeq
hCoV-19/Latvia/042/2020	EPI_ISL_486425	2020-03-22	5	4274x	Enrichment by hybridization capture	Illumina, MiSeq
hCoV-19/Latvia/044/2020	EPI_ISL_486426	2020-06-30	11	2763x	Enrichment by hybridization capture	Illumina, MiSeq
hCoV-19/Latvia/045/2020	EPI_ISL_486428	2020-03-22	2	4545x	Enrichment by hybridization capture	Illumina, MiSeq
hCoV-19/Latvia/046/2020	EPI_ISL_486430	2020-03-22	6	4368x	Enrichment by hybridization capture	Illumina, MiSeq
hCoV-19/Latvia/047/2020	EPI_ISL_486431	2020-03-22	13	6833x	Enrichment by hybridization capture	Illumina, MiSeq
hCoV-19/Latvia/048/2020	EPI_ISL_486432	2020-03-16	9	6247x	Enrichment by hybridization capture	Illumina, MiSeq
hCoV-19/Latvia/049/2020	EPI_ISL_486433	2020-03-16	7	5337x	Enrichment by hybridization capture	Illumina, MiSeq
hCoV-19/Latvia/050/2020	EPI_ISL_486434	2020-03-16	6	6222x	Enrichment by hybridization capture	Illumina, MiSeq
hCoV-19/Latvia/051/2020	EPI_ISL_486435	2020-03-16	7	4398x	Enrichment by hybridization capture	Illumina, MiSeq
hCoV-19/Latvia/052/2020	EPI_ISL_486436	2020-03-23	6	846x	Enrichment by hybridization capture	Illumina, MiSeq
hCoV-19/Latvia/053/2020	EPI_ISL_486437	2020-03-25	6	43x	Metatranscriptome	DNBSEQ-G400RS, MGI Tech Co., Ltd
hCoV-19/Latvia/054/2020	EPI_ISL_486438	2020-04-30	7	63x	Metatranscriptome	DNBSEQ-G400RS, MGI Tech Co., Ltd
hCoV-19/Latvia/043/2020	EPI_ISL_492988	2020-05-28	7	3991x	Amplification by multiplexed primers	Illumina, MiSeq
hCoV-19/Latvia/066/2020	EPI_ISL_492989	2020-07-08	10	4404x	Amplification by multiplexed primers	Illumina, MiSeq
hCoV-19/Latvia/055/2020	EPI_ISL_492990	2020-07-08	10	3715x	Amplification by multiplexed primers	Illumina, MiSeq
hCoV-19/Latvia/056/2020	EPI_ISL_492991	2020-07-07	10	3801x	Amplification by multiplexed primers	Illumina, MiSeq
hCoV-19/Latvia/057/2020	EPI_ISL_492992	2020-07-08	8	4169x	Amplification by multiplexed primers	Illumina, MiSeq
hCoV-19/Latvia/058/2020	EPI_ISL_492993	2020-07-08	8	4322x	Amplification by multiplexed primers	Illumina, MiSeq
hCoV-19/Latvia/059/2020	EPI_ISL_492994	2020-07-07	9	3363x	Amplification by multiplexed primers	Illumina, MiSeq
hCoV-19/Latvia/060/2020	EPI_ISL_492995	2020-07-07	12	4163x	Amplification by multiplexed primers	Illumina, MiSeq
hCoV-19/Latvia/061/2020	EPI_ISL_492996	2020-07-07	10	3534x	Amplification by multiplexed primers	Illumina, MiSeq
hCoV-19/Latvia/062/2020	EPI_ISL_492997	2020-07-03	10	1334x	Amplification by multiplexed primers	Illumina, MiSeq
hCoV-19/Latvia/063/2020	EPI_ISL_492998	2020-07-09	13	4315x	Amplification by multiplexed primers	Illumina, MiSeq
hCoV-19/Latvia/064/2020	EPI_ISL_492999	2020-07-09	8	773x	Amplification by multiplexed primers	Illumina, MiSeq
hCoV-19/Latvia/065/2020	EPI_ISL_493000	2020-07-08	10	4022x	Amplification by multiplexed primers	Illumina, MiSeq
hCoV-19/Latvia/067/2020	EPI_ISL_501275	2020-07-08	8	3200x	Amplification by multiplexed primers	Illumina, MiSeq
hCoV-19/Latvia/068/2020	EPI_ISL_501284	2020-07-10	8	3682x	Amplification by multiplexed primers	Illumina, MiSeq
hCoV-19/Latvia/069/2020	EPI_ISL_501285	2020-07-10	12	4184x	Amplification by multiplexed primers	Illumina, MiSeq
hCoV-19/Latvia/070/2020	EPI_ISL_501286	2020-06-05	10	3932x	Amplification by multiplexed primers	Illumina, MiSeq
hCoV-19/Latvia/071/2020	EPI_ISL_501287	2020-06-06	7	3345x	Amplification by multiplexed primers	Illumina, MiSeq
hCoV-19/Latvia/072/2020	EPI_ISL_501288	2020-07-10	10	4639x	Amplification by multiplexed primers	Illumina, MiSeq
hCoV-19/Latvia/073/2020	EPI_ISL_501289	2020-07-10	13	4606x	Amplification by multiplexed primers	Illumina, MiSeq
hCoV-19/Latvia/074/2020	EPI_ISL_501808	2020-07-06	11	5190x	Amplification by multiplexed primers	Illumina, MiSeq
hCoV-19/Latvia/075/2020	EPI_ISL_501817	2020-07-09	12	2923x	Amplification by multiplexed primers	Illumina, MiSeq
hCoV-19/Latvia/076/2020	EPI_ISL_501823	2020-07-16	9	3816x	Amplification by multiplexed primers	Illumina, MiSeq
hCoV-19/Latvia/077/2020	EPI_ISL_501829	2020-07-16	14	1132x	Amplification by multiplexed primers	Illumina, MiSeq
hCoV-19/Latvia/078/2020	EPI_ISL_501833	2020-07-17	11	4088x	Amplification by multiplexed primers	Illumina, MiSeq
hCoV-19/Latvia/079/2020	EPI_ISL_501839	2020-07-17	9	322x	Amplification by multiplexed primers	Illumina, MiSeq
hCoV-19/Latvia/080/2020	EPI_ISL_501849	2020-07-18	15	2729x	Amplification by multiplexed primers	Illumina, MiSeq
hCoV-19/Latvia/081/2020	EPI_ISL_501894	2020-07-20	15	250x	Amplification by multiplexed primers	Illumina, MiSeq
hCoV-19/Latvia/082/2020	EPI_ISL_501895	2020-07-14	13	4873x	Amplification by multiplexed primers	Illumina, MiSeq
hCoV-19/Latvia/083/2020	EPI_ISL_501896	2020-06-15	7	5512x	Amplification by multiplexed primers	Illumina, MiSeq
hCoV-19/Latvia/084/2020	EPI_ISL_501915	2020-06-16	8	4766x	Amplification by multiplexed primers	Illumina, MiSeq
hCoV-19/Latvia/085/2020	EPI_ISL_501922	2020-06-16	7	3296x	Amplification by multiplexed primers	Illumina, MiSeq
hCoV-19/Latvia/086/2020	EPI_ISL_501929	2020-07-09	10	4980x	Amplification by multiplexed primers	Illumina, MiSeq
hCoV-19/Latvia/087/2020	EPI_ISL_501936	2020-07-09	10	4248x	Amplification by multiplexed primers	Illumina, MiSeq
hCoV-19/Latvia/088/2020	EPI_ISL_512313	2020-06-17	11	2883x	Amplification by multiplexed primers	Illumina, MiSeq
hCoV-19/Latvia/089/2020	EPI_ISL_512314	2020-07-09	9	3332x	Amplification by multiplexed primers	Illumina, MiSeq
hCoV-19/Latvia/090/2020	EPI_ISL_512645	2020-07-22	9	3330x	Amplification by multiplexed primers	Illumina, MiSeq
hCoV-19/Latvia/091/2020	EPI_ISL_512646	2020-07-07	10	3593x	Amplification by multiplexed primers	Illumina, MiSeq
hCoV-19/Latvia/092/2020	EPI_ISL_512647	2020-06-26	10	2643x	Amplification by multiplexed primers	Illumina, MiSeq
hCoV-19/Latvia/093/2020	EPI_ISL_512648	2020-07-14	13	3664x	Amplification by multiplexed primers	Illumina, MiSeq
hCoV-19/Latvia/094/2020	EPI_ISL_512649	2020-07-21	11	3682x	Amplification by multiplexed primers	Illumina, MiSeq
hCoV-19/Latvia/095/2020	EPI_ISL_512650	2020-07-21	11	3745x	Amplification by multiplexed primers	Illumina, MiSeq
hCoV-19/Latvia/096/2020	EPI_ISL_512651	2020-07-23	10	3320x	Amplification by multiplexed primers	Illumina, MiSeq
hCoV-19/Latvia/097/2020	EPI_ISL_512652	2020-07-25	9	2830x	Amplification by multiplexed primers	Illumina, MiSeq
hCov-19/Latvia/098/2020	EPI_ISL_515185	2020-07-29	12	4176x	Amplification by multiplexed primers	Illumina, MiSeq
hCov-19/Latvia/099/2020	EPI_ISL_515186	2020-07-31	11	3191x	Amplification by multiplexed primers	Illumina, MiSeq
hCov-19/Latvia/100/2020	EPI_ISL_515187	2020-08-04	13	4296x	Amplification by multiplexed primers	Illumina, MiSeq
hCov-19/Latvia/101/2020	EPI_ISL_515188	2020-08-04	14	4137x	Amplification by multiplexed primers	Illumina, MiSeq
hCov-19/Latvia/102/2020	EPI_ISL_515189	2020-08-05	13	3888x	Amplification by multiplexed primers	Illumina, MiSeq
hCov-19/Latvia/103/2020	EPI_ISL_515190	2020-08-05	14	3488x	Amplification by multiplexed primers	Illumina, MiSeq
hCov-19/Latvia/104/2020	EPI_ISL_515191	2020-08-05	13	4111x	Amplification by multiplexed primers	Illumina, MiSeq
hCov-19/Latvia/105/2020	EPI_ISL_515192	2020-08-05	13	3429x	Amplification by multiplexed primers	Illumina, MiSeq
hCov-19/Latvia/106/2020	EPI_ISL_515193	2020-08-05	13	4349x	Amplification by multiplexed primers	Illumina, MiSeq
hCov-19/Latvia/107/2020	EPI_ISL_515194	2020-08-05	14	3860x	Amplification by multiplexed primers	Illumina, MiSeq
hCov-19/Latvia/108/2020	EPI_ISL_515195	2020-08-05	13	3696x	Amplification by multiplexed primers	Illumina, MiSeq
hCov-19/Latvia/109/2020	EPI_ISL_515196	2020-08-03	12	1090x	Amplification by multiplexed primers	Illumina, MiSeq
hCoV-19/Latvia/110/2020	EPI_ISL_534199	2020-08-06	13	3711x	Amplification by multiplexed primers	Illumina, MiSeq
hCoV-19/Latvia/111/2020	EPI_ISL_534200	2020-08-07	12	4159x	Amplification by multiplexed primers	Illumina, MiSeq
hCoV-19/Latvia/112/2020	EPI_ISL_534201	2020-08-10	10	2691x	Amplification by multiplexed primers	Illumina, MiSeq
hCoV-19/Latvia/113/2020	EPI_ISL_534202	2020-08-07	12	3601x	Amplification by multiplexed primers	Illumina, MiSeq
hCoV-19/Latvia/114/2020	EPI_ISL_534203	2020-08-08	12	1822x	Amplification by multiplexed primers	Illumina, MiSeq
hCoV-19/Latvia/115/2020	EPI_ISL_534204	2020-08-05	12	2597x	Amplification by multiplexed primers	Illumina, MiSeq
hCoV-19/Latvia/116/2020	EPI_ISL_534205	2020-08-06	11	3587x	Amplification by multiplexed primers	Illumina, MiSeq
hCoV-19/Latvia/117/2020	EPI_ISL_534206	2020-08-05	22	3284x	Amplification by multiplexed primers	Illumina, MiSeq
hCoV-19/Latvia/118/2020	EPI_ISL_534207	2020-07-29	11	3251x	Amplification by multiplexed primers	Illumina, MiSeq
hCoV-19/Latvia/119/2020	EPI_ISL_534208	2020-07-29	11	2955x	Amplification by multiplexed primers	Illumina, MiSeq
hCoV-19/Latvia/120/2020	EPI_ISL_534209	2020-07-31	11	2050x	Amplification by multiplexed primers	Illumina, MiSeq
hCoV-19/Latvia/121/2020	EPI_ISL_534210	2020-08-24	16	2283x	Amplification by multiplexed primers	Illumina, MiSeq
hCoV-19/Latvia/122/2020	EPI_ISL_534211	2020-08-24	17	3480x	Amplification by multiplexed primers	Illumina, MiSeq
hCoV-19/Latvia/123/2020	EPI_ISL_534212	2020-08-22	16	321x	Amplification by multiplexed primers	Illumina, MiSeq
hCoV-19/Latvia/124/2020	EPI_ISL_534213	2020-08-24	16	643x	Amplification by multiplexed primers	Illumina, MiSeq
hCoV-19/Latvia/125/2020	EPI_ISL_534214	2020-08-25	16	3986x	Amplification by multiplexed primers	Illumina, MiSeq
hCoV-19/Latvia/126/2020	EPI_ISL_534215	2020-08-25	16	2327x	Amplification by multiplexed primers	Illumina, MiSeq
hCoV-19/Latvia/127/2020	EPI_ISL_534216	2020-08-25	16	3292x	Amplification by multiplexed primers	Illumina, MiSeq
hCoV-19/Latvia/128/2020	EPI_ISL_534218	2020-08-25	16	3387x	Amplification by multiplexed primers	Illumina, MiSeq
hCoV-19/Latvia/129/2020	EPI_ISL_534219	2020-08-25	17	3125x	Amplification by multiplexed primers	Illumina, MiSeq
hCoV-19/Latvia/130/2020	EPI_ISL_534220	2020-08-25	16	3804x	Amplification by multiplexed primers	Illumina, MiSeq
hCoV-19/Latvia/131/2020	EPI_ISL_534221	2020-08-24	18	3702x	Amplification by multiplexed primers	Illumina, MiSeq
hCoV-19/Latvia/132/2020	EPI_ISL_534222	2020-08-22	10	3324x	Amplification by multiplexed primers	Illumina, MiSeq
hCoV-19/Latvia/133/2020	EPI_ISL_534223	2020-08-26	18	3588x	Amplification by multiplexed primers	Illumina, MiSeq
